# Supplementary material for: Differential Roles of Notch Receptors in Regulating Activation of Intact Adult Mouse Spinal Cord-derived NSCs
Source: Research Square preprint supplement (doi:10.21203/rs.3.rs-7540357/v1), 2025-09-11
Supplement: Supplementary file 1 [file 3d2b18cc471c7b4233770996.docx]

**Highlights**

- Adult sp-NSCs exist predominantly in a quiescent state.
- scRNA-Seq reveals an age-dependent increase in sp-NSC quiescence.
- Notch1 drives adult sp-NSC activation; Notch2 maintains quiescence.
- Loss of Notch1/2 in adult sp-NSCs impairs activation and quiescence maintenance, leading to stem cell exhaustion.
